# Supplementary material
Source: publisher figshare collection journal article supplement (https://tandf.figshare.com/ndownloader/files/22860269)
Supplement: Supplementary file 1 [file 22860269]

Appendix. Exposure limits for trichloramine in air

| Country | 8-hour TWA, mg/m3 | Reference |
| --- | --- | --- |
| *Occupational exposure limits* |  |  |
| Canada, Ontario | – | 1 |
| Denmark | – | 2 |
| European Union | – | 3 |
| Finland | 0.5 | 4 |
| Germany, AGS, DFG | – | 5, 6 |
| Norway | – | 7 |
| Sweden | – | 8 |
| United Kingdom | – | 9 |
| United States, OSHA | – | 10 |
| *Recommended values* |  |  |
| Canada, Workers Compensation Board | < 0.35 | 11 |
| France, ANSES/AFFSET | 0.3 | 12 |
| Germany, Environment Agency | 0.2 | 13 |
| Switzerland, SIA | 0.2 | 14 |
| WHO | 0.5 | 15 |

AFFSET: Agence française de sécurité sanitaire de l’environnement et du travail (Agency for environmental and occupational health safety), AGS: Ausschuss für Gefahrstoffe (Committee for Hazardous Substances), ANSES: Agence nationale de sécurité sanitaire de l’alimentation, de l’environnement et du travail (Agency for food, environmental and occupational health safety), DFG: Deutsche Forschungsgemeinschaft (German Research Foundation), OSHA: Occupational Safety and Health Administration, SIA: Schweizerischer Ingenieur- und Architektenverein (Swiss Society of Engineers and Architects), TWA: time-weighted average, WHO: World Health Organization.

**References**

1. *Current occupational exposure limits for Ontario workplaces required under Regulation 833*. https://www.labour.gov.on.ca/english/hs/pubs/oel_table.php (accessed March 2019). Toronto, Ontario, Canada: Ontario Ministry of Labour, 2018.

2. *Grænsværdier for stoffer og materialer*.

https://amid.dk/regler/bekendtgoerelser/graensevaerdier-stoffer-materialer-655/bilag-2/ (accessed March 2019). Copenhagen, Denmark: Arbejdstilsynet, 2018.

3. *Indicative occupational exposure limit values*. Directive 2017/164/EU (4th list), 2009/161/EU (3rd list), [2006/15/EC](https://osha.europa.eu/en/legislation/directives/commission-directive-2006-15-ec) (2nd list) and [2000/39/EC](https://osha.europa.eu/en/legislation/directives/directive-2000-39-ec-indicative-occupational-exposure-limit-values) (1st list).

https://osha.europa.eu/sv/legislation/directives/exposure-to-chemical-agents-and-chemical-safety/ (accessed March 2019). Brussels, Belgium: The Commission of the European communities, 2000–2017.

4. *HTP-värden 2018*. Koncentrationer som befunnits skadliga. <http://urn.fi/URN:ISBN:978-952-00-3946-2> (accessed March 2019). Helsinki, Finland: Social- och hälsovårdsministeriets publikationer 2018:10.

5. *TRGS 900 Arbeitsplatzgrenzwerte*. Technische Regel für Gefahrstoffe.

<https://www.baua.de/DE/Angebote/Rechtstexte-und-Technische-Regeln/Regelwerk/TRGS/pdf/TRGS-900.pdf?__blob=publicationFile>, 2006 (accessed March 2019). Germany: Bundesanstalt für Arbeitsschutz und Arbeitsmedizin (BAuA), Ausschuss für Gefahrstoffe (AGS), 2006 (updated 2018).

6. *MAK‐ und BAT‐Werte‐Liste 2018:* Ständige Senatskommission zur Prüfung gesundheits­schädlicher Arbeitsstoffe. Mitteilung 54.

https://onlinelibrary.wiley.com/doi/pdf/10.1002/9783527818396.ch2 (accessed March 2019). Bonn, Germany: Deutsche Forschungsgemeinschaft (DFG), 2018.

7. *Forskrift om tiltaks- og grenseverdier*. https://lovdata.no/dokument/SF/forskrift/2011-12-06-1358#KAPITTEL_5 (accessed March 2019). Trondheim, Norway: Direktoratet for arbeids­tilsynet, 2011 (updated 2019).

8. *Hygieniska gränsvärden*. Arbetsmiljöverkets författningssamling, AFS 2018:1.

https://www.av.se/arbetsmiljoarbete-och-inspektioner/publikationer/foreskrifter/hygieniska-gransvarden-afs-20181-foreskrifter/ (accessed March 2019). Stockholm, Sweden: Arbets­miljöverket, 2018.

9. *EH40/2005 Workplace exposure limits*. 3rd ed.

http://www.hse.gov.uk/pubns/priced/eh40.pdf (accessed March 2019). London, United Kingdom: Health and Safety Executive (HSE), 2018.

10. *Table Z-1 Limits for air contaminants*.

https://www.osha.gov/laws-regs/regulations/standardnumber/1910/1910.1000TABLEZ1 (accessed March 2019). Washington, DC, United States: Occupational Safety and Health Administration (US OSHA), 2019.

11. *Chloramines. Safe work practices*, 45 pp. <https://www.worksafebc.com/en/resources/health-safety/books-guides/chloramines-safe-work-practices?lang=en> (accessed March 2019). British Columbia, Canada: Workers’ Compensation Board of British Columbia (WorksafeBC), 2014.

12. *Risques sanitaires liés aux piscines. Évaluation des risques sanitaires liés aux piscines. Partie 1: piscines réglementées*. Avis de l’Afsset. Rapport d’expertise collective, 254 pp.

https://www.researchgate.net/profile/Jean-Luc_Boudenne/publication/282672748_Evaluation_des_risques_sanitaires_lies_aux_piscines_Partie_1_piscines_reglementees/links/56181b8108ae78721f9a9646/Evaluation-des-risques-sanitaires-lies-aux-piscines-Partie-1-piscines-reglementees.pdf?origin=publication_detail (accessed March 2019). Maisons-Alfort, France: Agence française de sécurité sanitaire de l’environnement et du travail (AFSSET), 2010.

13. *Risk assessment of trichloramine in the air of indoor swimming pools.* Working Group on Indoor Guide Values of the Federal Environment Agency and the States’ Health Authorities. *Bundesgesundheitsblatt Gesundheitsforschung Gesundheitsschutz* 2011;54:997-1004.

14. *Wasser und Wasseraufbereitungsanlagen in Gemeinschaftsbädern. Anforderungen und ergänzende Bestimmungen für Bau und Betrieb*. Schweizer Norm SN 546 385/9, 68 pp. Zürich; Switzerland: Schweizerischer Ingenieur- und Architektenverein (SIA), 2011.

15. *Guidelines for safe recreational water environments Vol. 2. Swimming pools and similar environments,* 118 pp. http://www.who.int/iris/handle/10665/43336 (accessed March 2019). Geneva, Switzerland: World Health Organization (WHO), Water, Sanitation and Health Team, 2006.
